# Supplementary material for: Hydroxide-ion binding to nonionic interfaces in aqueous solution
Source: Royal Society of Chemistry journal article supplement (doi:10.1039/b607783h), 2006-01-01
Supplement: b607783h.pdf [file b607783h.pdf]

## Hydroxide-Ion Binding to Nonionic Interfaces in Aqueous Solution

### Supporting information

Jaap E. Klijn, Marco Scarzello, Marc C.A. Stuart, Anno Wagenaar and Jan B.F.N. Engberts<sup>1</sup>

Physical Organic Chemistry Unit, Stratingh Institute, University of Groningen, 9747 AG Groningen, The Netherlands

#### S1. Experimental

*Materials.* Gemini surfactants were synthesised as will described in a forthcoming paper.<sup>1</sup> Hepes, Mes (4-morpholinoethanesulfonic acid), APS (3-amino-1-propanesulfonic acid) and taurine (2-aminoethanesulfonic acid) were purchased from Sigma and used as received.

*Sample Preparation.* Solutions of gemini surfactant in chloroform were dried under a stream of nitrogen. Traces of residual solvent were removed under high vacuum. To obtain small unilamellar vesicles (SUVs) with a narrow and reproducible size distribution, the lipid films were hydrated at room temperature in bidistilled water containing 5 mM each of the buffer substances Hepes, Mes and taurine and 10 mM of APS at a pH close to the pH of phase separation of the gemini surfactant (unless stated otherwise), vortexed for several minutes, briefly tip sonicated (<30 sec), freeze-thawed [ $N_2(l) \leftrightarrow$  water bath (40 °C)] 5 times, and extruded 11 times through a 200-nm-pore-size polycarbonate filter.

The samples for light scattering measurements were prepared by diluting the 5 mM (total lipid concentration) vesicular stock solutions to a final concentration of 0.25 mM and adding the appropriate amount of HCl (aq) or NaOH (aq) to the desired pH. The dispersions were allowed to equilibrate overnight before measuring.

*Static and Dynamic Light Scattering.* Static and dynamic light scattering measurements were performed at 25 °C on a Zetasizer 5000 instrument (Malvern Instruments, U.K.) at  $\lambda=633$  nm. To obtain the hydrodynamic radii, the intensity autocorrelation functions were analyzed using CONTIN.

*Cryo-Transmission Electron Microscopy.* A drop of the lipid suspension was deposited on a glow discharged holey carbon-coated grid. After blotting away the excess of lipid, the grids were rapidly plunged into liquid ethane. The frozen specimen were mounted in a Gatan (model 626) cryo-stage and examined in a Philips CM 120 cryo-electron microscope operating at 120 kV. Micrographs were recorded under low-dose conditions. Cryo-electron microscopy pictures of **2** were taken from grids vitrified in a controlled environmental chamber at 100% humidity.

*Turbidity.* Turbidity was measured by taking the absorbance at 450 nm of a 0.25 mM solution of **2**. The samples were equilibrated overnight at 35°C. Then the temperature was lowered in steps of a few degrees and the turbidity was taken when the absorbance reached a stable level. The turbidity data was plotted against the

---

<sup>1</sup> To whom correspondence should be addressed. E-mail: J.B.F.N.Engberts@rug.nl

temperature and fitted to a sigmoidal equation leading to the phase transition temperature and the width of the transition.

### S2. Static and Dynamic Light Scattering Results

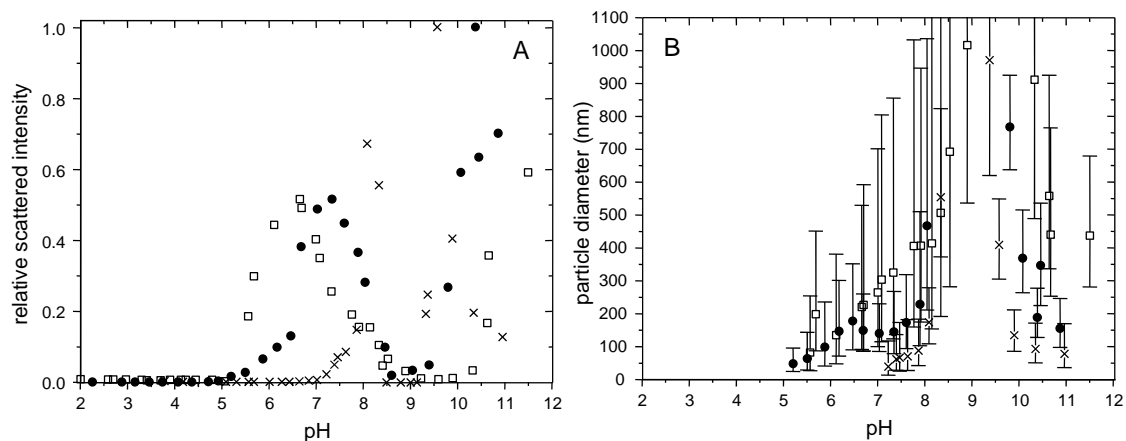

**Figure 1.** Relative scattered intensity (A) and size distributions (B) of solutions containing aggregates formed from compound **2** (x), **3** (□) and **4** (●) as a function of pH. Error bars denote the width of the size distribution.<sup>2</sup> In A the data for **3** and **4** has been normalised with respect to each other at pH 6.6 and pH 7.3, respectively.

For the dynamic and static light scattering experiments the 5 mM stock solution of **3** was prepared at pH 3.4 and therefore not freeze-thawed and extruded.

### S3. Cryo-electron microscopy

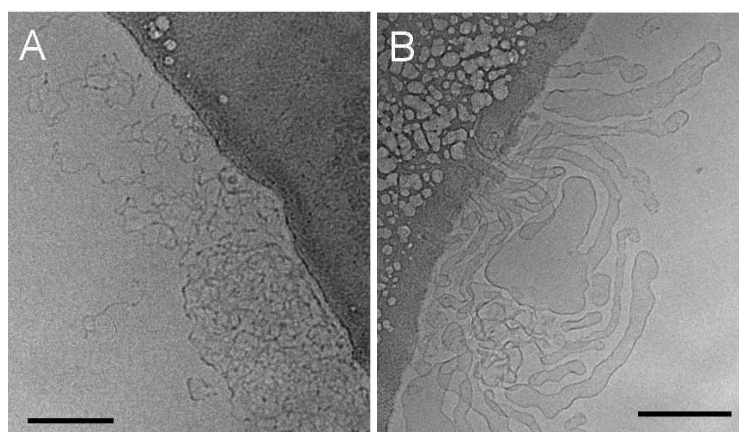

**Figure 2.** Cryo-electron microscopy pictures of **2** equilibrated over night at pH 7.4. Samples were vitrified at 10°C (A) and 25°C (B). Bar represents 100 nm.

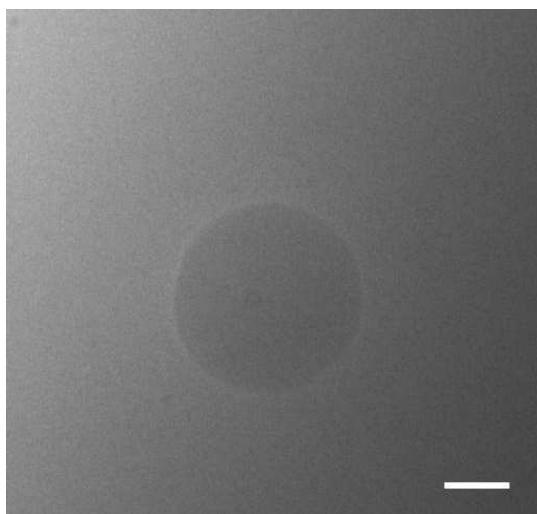

**Figure 3.** Cryo-electron microscopy pictures of **4** equilibrated over night at pH 11.1. Bar represents 100 nm.

#### S4. Turbidity

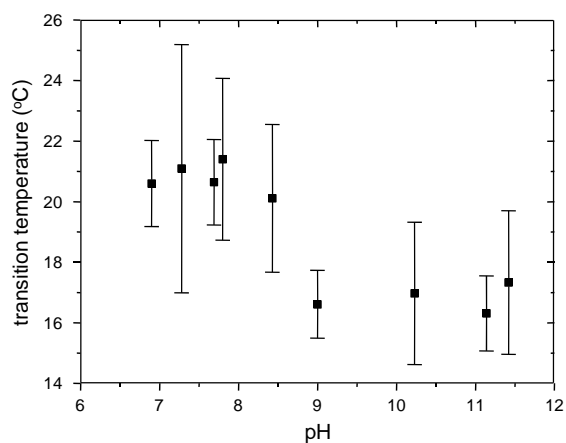

**Figure 4.** Transition temperatures of **2** of the transition from vesicles to wormlike micelles as a function of pH. Error bars denote the width of the transition.

#### References

- (1) Wagenaar, A.; Engberts, J. B. F. N. *manuscript in preparation*
- (2) Size distributions were obtained by fitting a Gaussian function to intensity as function of the logarithm of the particle diameter. The width of the size distribution is then the width at half height.
